# Supplementary material
Source: PubMed Central journal article supplement (PMC333422)
Supplement: ar993-S3.pdf [file ar993-S3.pdf]

### Additional file 3

Affymetrix data from RNA samples, prepared from inguinal lymph nodes of three DA rats and three E3 rats injected with 150 µl pristane 8 days before analysis. The RNA samples were prepared and analyzed individually for these rats. The differentially expressed genes are presented as DA versus E3 rats. The Affymetrix data was analyzed statistically using the D-chip software and sorted on the absolute t-statistic. Fifteen genes with the highest probability of being downregulated and fifteen genes with the highest probability of being upregulated are presented. These thirty genes were regarded as differentially expressed by this method.

| Up-regulated genes      |                                                                         |             |             |         |
|-------------------------|-------------------------------------------------------------------------|-------------|-------------|---------|
| DAvsE3, LN, d8 (indiv.) |                                                                         |             |             |         |
| Affy probe set          | Description                                                             | Fold Change | t-statistic | p-value |
| X56596_at               | MHC class II antigen RT1.B-1 beta-chain                                 | 43.4        | 10.5        | 0.00014 |
| M10094_g_at             | RT1 class Ib gene                                                       | 5.9         | 7.4         | 0.00072 |
| rc_Ai176589_at          | ribosomal protein L27                                                   | 4.3         | 6.1         | 0.00178 |
| D49955_at               | bone marrow stromal cell antigen 1                                      | 3.9         | 6.3         | 0.00153 |
| rc_Ai171090_g_at        | EST217038                                                               | 2.9         | 6.9         | 0.001   |
| J05495_at               | Gal/GalNAc-specific lectin                                              | 2           | 5.7         | 0.00231 |
| AF087943_s_at           | CD14 antigen                                                            | 1.9         | 7.2         | 0.00083 |
| rc_AA894330_s_at        | Ca <sup>++</sup> /calmodulin-dependent protein kinase II, delta subunit | 1.7         | 12.3        | 0.00006 |
| rc_Ai232307_at          | EST228995                                                               | 1.7         | 6.4         | 0.00137 |
| M64092_at               | cAMP-dependent protein kinase inhibitor 2                               | 1.5         | 7.2         | 0.00081 |
| U24441_at               | gelatinase B                                                            | 1.5         | 6.5         | 0.00126 |
| D37920_at               | squalene epoxidase                                                      | 1.5         | 5.7         | 0.00234 |
| rc_Ai172064_at          | beta-galactoside-binding lectin                                         | 1.4         | 5.9         | 0.00194 |
| rc_Ai237731_s_at        | Lipoprotein lipase                                                      | 1.3         | 7.9         | 0.00053 |
| rc_AA818593_g_at        | phosphatidate phosphohydrolase type 2                                   | 1.3         | 5.8         | 0.00216 |
| Down-regulated genes    |                                                                         |             |             |         |
| DAvsE3, LN, d8 (indiv.) |                                                                         |             |             |         |
| Affy probe set          | Description                                                             | Fold Change | t-statistic | p-value |
| U65217_i_at             | MHC class II antigen RT1.B beta                                         | -406.9      | -8.6        | 0.00034 |
| L07401_f_at             | Ig rearranged gamma-chain                                               | -5.8        | -6.6        | 0.00119 |
| X70871_at               | Cyclin G1                                                               | -4.8        | -6.8        | 0.00103 |
| rc_Ai639510_at          | rx02430                                                                 | -3.4        | -8.2        | 0.00044 |
| U67994_at               | DNA primase small subunit                                               | -3.1        | -9.3        | 0.00024 |
| rc_Ai234828_g_at        | EST231390                                                               | -3.1        | -8.6        | 0.00036 |
| rc_AA946503_at          | EST202002                                                               | -3          | -11.1       | 0.0001  |
| AJ011608_at             | DNA polymerase alpha subunit IV (primase)                               | -2.6        | -6.9        | 0.00097 |
| L23128_g_at             | RT1 class Ib gene                                                       | -2.5        | -7.2        | 0.00079 |
| U67140_at               | PSD-95/SAP90-associated protein-4                                       | -2.4        | -5.8        | 0.00212 |
| X70667cds_at            | melanocortin-3 receptor                                                 | -2.2        | -5.8        | 0.00211 |
| rc_Ai639203_at          | rx03460                                                                 | -1.7        | -5.9        | 0.00205 |
| rc_Ai145680_s_at        | Solute carrier 16                                                       | -1.5        | -6.2        | 0.00164 |
| rc_AA899854_at          | topoisomerase (DNA) II alpha                                            | -1.4        | -6.7        | 0.00111 |
| rc_AA900199_s_at        | cDNAclone                                                               | -1.3        | -7.2        | 0.00082 |
