# Supplementary material
Source: PubMed Central journal article supplement (PMC333422)
Supplement: ar993-S4.pdf [file ar993-S4.pdf]

**Additional file 4**

Taqman analysis was performed on five selected genes. Individual RNA samples from five pristane-injected DA and five E3 rats were analyzed. Differentially expressed genes with Mann–Whitney  $P < 0.05$  are regarded as differentially expressed genes, and genes with  $P < 0.1$  are regarded as genes with a tendency toward differential expression. \*Cyclin G was expressed in all the E3 rats investigated, but it was not detectable in the DA rats.

| Gene                                   | Accession No | Fold change     | t-test |
|----------------------------------------|--------------|-----------------|--------|
| Cyclin G1                              | X70871       | Down-regulated* | *      |
| DNA polymerase $\alpha$ IV (primase)   | AJ011608     | -3.46           | 0.02   |
| gelatinase B                           | U24441       | 1.88            | 0.06   |
| Ig rearranged $\gamma$ -chain V-region | L07401       | -2.05           | 0.11   |
| bone marrow stromal cell antigen 1     | D49955       | -1.83           | 0.24   |
