# Supplementary material
Source: PubMed Central journal article supplement (PMC333422)
Supplement: ar993-S6.pdf [file ar993-S6.pdf]

## Additional file 6

Custom-made glass oligomer chip results from RNA samples, prepared from inguinal lymph nodes of five naïve DA rats and five naïve E3 rats. The DA rat RNA samples were prepared and analyzed individually in comparison with a pool of RNA from the five E3 rats. The differentially expressed genes are presented as DA versus E3 rats. The data were analyzed statistically using Statview software. All genes with  $t$ -test  $P < 0.05$  are regarded as differentially expressed in this method, and genes with  $P > 0.05$  but  $< 0.1$  are regarded as genes with a tendency toward differential expression.

| Down-regulated genes |                                                                        |                  |         |         |
|----------------------|------------------------------------------------------------------------|------------------|---------|---------|
| DAvsE3, LN, d0       |                                                                        |                  |         |         |
| Accession No         | Gene ID                                                                | Mean Fold Change | t-Value | P-Value |
| s81289               | IgM kappa chain variable region                                        | -1.6             | -10.6   | 0       |
| j00710               | rat casein-alpha                                                       | -2.1             | -4.5    | 0.01    |
| Up-regulated genes   |                                                                        |                  |         |         |
| DAvsE3, LN, d0       |                                                                        |                  |         |         |
| Accession No         | Gene ID                                                                | Mean Fold Change | t-Value | P-Value |
| x160581              | Interleukin-4                                                          | 1.6              | 5.2     | 0.01    |
| u097931              | p21 (c-Ki-ras)                                                         | 1.4              | 4.7     | 0.01    |
| s49003               | short isoform growth hormone receptor                                  | 1.5              | 4.2     | 0.01    |
| x139051              | ras-related rab1B protein                                              | 1.3              | 4.1     | 0.02    |
| u323141              | pyruvate carboxylase mRNA                                              | 1.2              | 4.1     | 0.02    |
| af0256711            | caspase 2 (Ich1)                                                       | 1.6              | 3.8     | 0.02    |
| m258231              | Leukocyte common antigen CD45RC                                        | 1.9              | 3.7     | 0.02    |
| d497851              | protein kinase (MUK)                                                   | 1.6              | 3.6     | 0.02    |
| j046291              | (Na+, K+)-ATPase-beta-2 subunit                                        | 1.7              | 3.6     | 0.02    |
| x867891              | sensory neuron synuclein                                               | 1.5              | 3.4     | 0.03    |
| m340971              | natural killer (NK) cell protease 1 (RNKP-1)                           | 1.7              | 3.4     | 0.03    |
| aj1318481            | collagen alpha 1 type X                                                | 1.9              | 3.1     | 0.04    |
| nm_0131211           | CD28                                                                   | 1.3              | 3       | 0.04    |
| j025851              | liver stearyl-CoA desaturase mRNA                                      | 1.5              | 3       | 0.04    |
| x004611              | alpha-lactalbumin                                                      | 1.3              | 2.9     | 0.04    |
| d107701              | beta isoform of catalytic subunit of cAMP-dependent protein kinase     | 1.6              | 2.8     | 0.05    |
| x99121               | RT6 gene                                                               | 1.4              | 2.8     | 0.05    |
| m340831              | lactogen receptor                                                      | 2.1              | 2.8     | 0.05    |
| d004031              | interleukin-1 alpha                                                    | 1.3              | 2.7     | 0.05    |
| u409991              | retinal protein (RRG4)                                                 | 1.4              | 2.7     | 0.06    |
| u103571              | pyruvate dehydrogenase kinase 2 subunit p45 (PDK2)                     | 1.4              | 2.6     | 0.06    |
| d851001              | very-long-chain acyl-CoA synthetase                                    | 3                | 2.6     | 0.06    |
| u826231              | cytocentrin                                                            | 1.5              | 2.6     | 0.06    |
| u313301              | B7.2                                                                   | 1.6              | 2.6     | 0.06    |
| z838691              | serine/threonine kinase MARK2                                          | 1.4              | 2.6     | 0.06    |
| af0104661            | interferon gamma                                                       | 1.8              | 2.6     | 0.06    |
| l208691              | pancreatitis associated protein III (PAPIII0)                          | 1.4              | 2.5     | 0.06    |
| ab0057431            | fatty acid transporter                                                 | 1.3              | 2.5     | 0.07    |
| s72506               | glutathione S-transferase Yc2 subunit                                  | 1.5              | 2.5     | 0.07    |
| u047401              | platelet-activating factor receptor                                    | 1.5              | 2.4     | 0.07    |
| u789771              | putative ATPase mRNA                                                   | 1.2              | 2.4     | 0.08    |
| s677221              | cyclooxygenase isoform COX-2                                           | 1.7              | 2.4     | 0.08    |
| d285121              | Synaptotagmin III                                                      | 1.8              | 2.4     | 0.08    |
| m828261              | leucopus neurofibromatosis protein type I                              | 1.6              | 2.3     | 0.08    |
| u034701              | FAS ligand                                                             | 3.2              | 2.3     | 0.08    |
| d252901              | K-cadherin                                                             | 1.5              | 2.2     | 0.09    |
| nm_0192951           | Lymphocyte antigen CD5                                                 | 1.5              | 2.2     | 0.09    |
| u244411              | gelatinase B (GelB) mRNA                                               | 1.6              | 2.2     | 0.09    |
| ab0106351            | carboxylesterase precursor                                             | 2.1              | 2.1     | 0.1     |
| l321321              | lipopolysaccharide binding protein                                     | 2.1              | 2.1     | 0.1     |
| d144191              | PP2A B $\beta$ mRNA for B regulatory subunit of protein phosphatase 2A | 1.6              | 2.1     | 0.1     |
| d263931              | HK2 gene for type II hexokinase, exon1 and promoter region ***         | 2.2              | 2.1     | 0.1     |
| m15402               | Ig active kappa-chain                                                  | 1.7              | 2.1     | 0.1     |
| af0533121            | CC chemokine ST38 precursor                                            | 1.6              | 2.1     | 0.1     |
| m61725               | transcription factor UBF2                                              | 1.8              | 2.1     | 0.1     |
| l120251              | tumor-associated glycoprotein E4 (Tage4) mRNA                          | 1.8              | 2.1     | 0.1     |
| aa685903             | similar to Glucose regulated protein, 94 kDa (GRP94)                   | 1.3              | 2.1     | 0.1     |
| s875221              | leukotriene A4 hydrolase                                               | 1.3              | 2       | 0.1     |
| x985171              | macrophage metalloelastase (MME)                                       | 1.5              | 1.9     | 0.1     |
| x00923               | immunoglobulin epsilon heavy chain                                     | 1.9              | 1.9     | 0.1     |
| l07399               | immunoglobulin rearranged gamma-chain (V) region                       | 2                | 1.9     | 0.1     |
| m271511              | muscle regulatory factor mRNA MRF4                                     | 1.4              | 1.9     | 0.1     |
| y077041              | BEST5 mRNA for hypothetical protein                                    | 1.5              | 1.9     | 0.1     |
| af0139851            | CD40 ligand                                                            | 1.3              | 1.9     | 0.1     |
| d499551              | bone marrow stromal cell antigen 1 (BST-1)                             | 2                | 1.9     | 0.1     |
