# Supplementary material
Source: PubMed Central journal article supplement (PMC333422)
Supplement: ar993-S7.pdf [file ar993-S7.pdf]

## Additional file 7

Custom-made glass oligomer chip results from RNA samples, prepared from inguinal lymph nodes of five DA rats and five E3 rats injected with 150  $\mu$ l pristane 8 days before analysis. The DA rat RNA samples were prepared and analyzed individually in comparison with a pool of RNA from the five E3 rats. The differentially expressed genes are presented as DA versus E3 rats. The data were analyzed statistically using Statview software. All genes with  $t$ -test  $P < 0.05$  are regarded as differentially expressed in this method, and genes with  $P > 0.05$  but  $< 0.1$  are regarded as genes with a tendency toward differential expression.

| Down-regulated genes |                                                             |                  |         |         |
|----------------------|-------------------------------------------------------------|------------------|---------|---------|
| DAvsE3, LN, d8       |                                                             |                  |         |         |
| Accession No         | Gene ID                                                     | Mean Fold Change | t-Value | P-Value |
| s81289               | IgM kappa chain                                             | -2.5             | -11.4   | 0       |
| I07399               | immunoglobulin rearranged gamma-chain                       | -2               | -7.8    | 0       |
| s692061              | protease 1 [rats. mast cells]                               | -2.1             | -7.6    | 0       |
| m14434               | Ig active kappa-chain                                       | -1.9             | -6.6    | 0       |
| ab0106351            | carboxylesterase precursor                                  | -2.5             | -6.5    | 0       |
| m15402               | Ig active kappa-chain                                       | -3               | -5.2    | 0.01    |
| d007531              | contrapsin-like protease inhibitor related protein (CPI-26) | -2.3             | -5.2    | 0.01    |
| aa685903             | similar to Glucose regulated protein. 94 kDa (GRP94)        | -1.8             | -4.8    | 0.01    |
| af0104661            | interferon gamma                                            | -1.8             | -4.8    | 0.01    |
| d252901              | K-cadherin                                                  | -1.7             | -4.7    | 0.01    |
| nm_0126751           | tumour necrosis factor alpha                                | -1.7             | -4.4    | 0.01    |
| x004611              | alpha-lactalbumin                                           | -1.6             | -5.6    | 0.01    |
| I054891              | heparin-binding EGF-like growth factor mRNA                 | -3.2             | -5.3    | 0.01    |
| nm_0131211           | CD28                                                        | -2.2             | -5.2    | 0.01    |
| u313301              | B7.2                                                        | -2               | -3.6    | 0.02    |
| ab0161601            | GABAB receptor 1c                                           | -1.7             | -3.3    | 0.03    |
| y077041              | BEST5 mRNA for hypothetical protein                         | -1.7             | -3.3    | 0.03    |
| d004031              | interleukin-1 alpha                                         | -1.5             | -3.1    | 0.04    |
| d261121              | FAS                                                         | -2.6             | -3.1    | 0.04    |
| af0264761            | transcription factor USF-1 mRNA                             | -1.6             | -2.8    | 0.05    |
| x00923               | immunoglobulin epsilon heavy chain                          | -2               | -2.8    | 0.05    |
| ab0055491            | atypical PKC specific binding protein                       | -1.5             | -2.8    | 0.05    |
| j025851              | liver stearyl-CoA desaturase mRNA                           | -1.5             | -2.3    | 0.08    |
| m980491              | pancreatitis-associated protein (pap) mRNA                  | -1.6             | -2.1    | 0.1     |
| j014358              | mitochondrial cytochrome oxidase subunits I.II. III genes   | -1.1             | -2.1    | 0.1     |
| m639831              | hypoxantin                                                  | -1.4             | -2      | 0.1     |
| j00710               | rat casein-alpha                                            | -1.6             | -2      | 0.1     |
| m772451              | beta -chain clathrin associated protein complex AP-2        | -1.7             | -2      | 0.1     |
| I120251              | tumor-associated glycoprotein E4 (Tage4) mRNA               | -1.8             | -2      | 0.1     |
| Up-regulated genes   |                                                             |                  |         |         |
| DAvsE3, LN, d8       |                                                             |                  |         |         |
| Accession No         | Gene ID                                                     | Mean Fold Change | t-Value | P-Value |
| s814781              | CL100 PTPase                                                | 1.6              | 4.1     | 0.02    |
| u65217               | MHC class II antigen RT1.B beta chain                       | 4.1              | 3       | 0.04    |
| x125351              | ras-related protein p23                                     | 2.1              | 2.6     | 0.06    |
| m293111              | MHC class II-IA alpha                                       | 2.8              | 2.4     | 0.07    |
| af0014171            | zinc finger protein mRNA                                    | 1.6              | 2.2     | 0.09    |
| m61725               | transcription factor UBF2 mRNA                              | 2.1              | 2       | 0.1     |
| x56596               | MHC class II antigen RT1.B-1 beta-chain                     | 2.8              | 1.9     | 0.1     |
