# Supplementary material
Source: PubMed Central journal article supplement (PMC333422)
Supplement: ar993-S8.pdf [file ar993-S8.pdf]

### Additional file 8

Fluorescence activated cell sorting (FACS) results. Three naïve and three pristane-treated individuals of each rat strain were analyzed by flow cytometry to determine whether differential detection on mRNA level was correlated with protein level. The differentially expressed genes are presented as DA versus E3 rats. The data were analyzed statistically using the Statview software. All genes with Mann–Whitney  $P < 0.05$  are regarded as differentially expressed in this method, and genes with  $P > 0.05$  but  $< 0.1$  are regarded as genes with a tendency toward differential expression. D, decreased; I, increased; NC, no change (fold change value = 1).

| Day 0     |                     | Day 8     |                     |
|-----------|---------------------|-----------|---------------------|
| Phenotype | FACS                | Phenotype | FACS                |
| RT1.B     | I(1.2), $p < 0.08$  | RT1.B     | I(1.9), $p < 0.03$  |
| CD45RC    | D(-1.2), $p < 0.08$ | CD45RC    | D(-1.8), $p < 0.03$ |
| CD28      | D(-1.8), $p < 0.2$  | CD28      | D(-9.8), $p < 0.03$ |
| IgM       | D(-1.2), $p < 0.6$  | IgM       | I(1.1), $p < 0.3$   |
| RT6       | D(-1.1), $p < 0.2$  | RT6       | NC                  |
| IFNg      | D(-1.3), $p < 0.2$  | IFNg      | I(1.3), $p < 0.03$  |
| B7.2      | NC                  | B7.2      | D(-1.1), $p < 0.5$  |
