# Supplementary material
Source: PubMed Central journal article supplement (PMC333422)
Supplement: ar993-S9.pdf [file ar993-S9.pdf]

### Additional file 9

ELISA result. Plasma from four naïve and pristane-treated individuals from each rat strain were analyzed by ELISA to determine whether the differential detection of immunoglobulins on mRNA level was correlated with the immunoglobulin concentrations in plasma. The data were analyzed statistically using the Statview software. All genes with Mann–Whitney  $P < 0.05$  are regarded as differentially expressed in this method, and genes with  $P > 0.05$  but  $< 0.1$  are regarded as genes with a tendency toward differential expression. D, decreased; I, increased.

| Day 0     |                    |
|-----------|--------------------|
| Phenotype | ELISA              |
| Total IgG | I(1.1), $p > 0.99$ |
| Total IgM | I(1.6), $p < 0.02$ |
| Total IgE | I(1.4), $p < 0.02$ |

| Day 8     |                     |
|-----------|---------------------|
| Phenotype | ELISA               |
| Total IgG | D(-3.0), $p < 0.03$ |
| Total IgM | I(1.6), $p < 0.03$  |
| Total IgE | D(-1.9), $p < 0.08$ |
